# Regulation of the *Arabidopsis* root vascular initial population by *LONESOME HIGHWAY*

Kyoko Ohashi-Ito\* and Dominique C. Bergmann†

Complex organisms consist of a multitude of cell types arranged in a precise spatial relation to each other. *Arabidopsis* roots generally exhibit radial tissue organization; however, within a tissue layer, cells are not identical. Specific vascular cell types are arranged in diametrically opposed longitudinal files that maximize the distance between them and create a bilaterally symmetric (diarch) root. Mutations in the *LONESOME HIGHWAY* (*LHW*) gene eliminate bilateral symmetry and reduce the number of cells in the center of the root, resulting in roots with only single xylem and phloem poles. *LHW* does not appear to be required for the creation of any specific cell type, but coordinately controls the number of all vascular cell types by regulating the size of the pool of cells from which they arise. We cloned *LHW* and found that it encodes a protein with weak sequence similarity to basic helix-loop-helix (bHLH)-domain proteins. *LHW* is a transcriptional activator in vitro. In plants, *LHW* is nuclear-localized and is expressed in the root meristems, where we hypothesize it acts independently of other known root-patterning genes to promote the production of stele cells, but might also indirectly feed into established regulatory networks for the maintenance of the root meristem.

**KEY WORDS:** *Arabidopsis*, Root pattern, Symmetry, Vasculature

## INTRODUCTION

Multicellular organisms must coordinate division and expansion of the constituent cell types of each tissue to ensure organized development. Plants develop via the activity of continuously dividing and self-renewing populations of cells called meristems. Two major meristematic populations, the shoot apical meristem (SAM) and root meristem (RM), are formed in the embryo, and generate and pattern the bulk of the above- and below-ground portions of the plant, respectively. Other populations, however, also generate new cells; these include shoot auxiliary meristems, lateral root meristems and dispersed groups of cells such as stomatal meristemoids. Each of these populations maintains a constant size during normal development, requiring that cell division and the production of differentiated offspring are tightly controlled.

The RM has a stem-cell population that divides asymmetrically to create each of the tissue layers. Cells in this population (initial cells) maintain competence to divide by their proximity to the quiescent center (QC), which is specified by the coordinate activity of the hormone auxin, as mediated via the AP2 class transcription factors PLETHORA1 (PLT1) and PLT2 (Aida et al., 2004), and the GRAS family transcription factors SCARECROW (SCR) and SHORTROOT (SHR) (Sabatini et al., 2003). Although the SHR protein is a transcription factor, it also serves as a positional cue by virtue of its regulated movement from the center of the root to the neighboring cell layers, where it activates SCR (Nakajima et al., 2001). Downstream of these regulators that position the root stem cells, the *Arabidopsis* homolog of the Retinoblastoma gene, *RETINOBLASTOMA-RELATED* (*RBR1*), appears to behave similarly to its animal counterparts in repressing cell divisions within the stem cell population (Wildwater et al., 2005). Although it

appears that initial cells for each of the different tissue types are regulated by this common pathway, very little is known about the initial cells for central tissues in the root.

These central tissues are collectively referred to as the stele. Clonal analysis of *Arabidopsis* embryos has indicated that all of the tissues of the stele – the pericycle, vascular elements (xylem and phloem) and some ground tissue – share a common origin (Dolan et al., 1993; Kidner et al., 2000). When viewed in cross-section, the tissues in the stele exhibit a stereotyped, species-specific arrangement. The small *Arabidopsis* root invariably has two xylem poles diametrically opposed (diarch; Fig. 1A), whereas the roots of other plants, such as wild-grown radish, can vary from being diarch through to heptarch (reviewed in Turner and Sieburth, 2002). Lateral roots are produced by postembryonic divisions in the pericycle. In the roots of many species, including *Arabidopsis*, only the pericycle cells adjacent to the xylem poles are capable of initiating laterals. This leads to a predictable pattern of root growth somewhat analogous to the arrangement of organs in the shoot known as phyllotaxis.

Several genes and growth regulators have been implicated in root vascular development. *ALTERED PHLOEM DEVELOPMENT* (*APL*) encodes a MYB transcription factor required for the production of phloem. In the absence of *APL*, crucial proliferative divisions in the vascular cylinder do not take place and the phloem is not specified (Bonke et al., 2003). *WOODEN LEG* (*WOL*, also known as *CRE1* or *AHK4*) is also required for proliferation of the vascular cylinder. Plants homozygous for the *wol-1* mutation have fewer cells in the stele and fail to produce phloem (Mahonen et al., 2000; Scheres et al., 1995). *WOL* encodes a histidine kinase that functions in cytokinin response (Inoue et al., 2001; Mahonen et al., 2000). Further work with this kinase family, as well as classic physiology experiments, has implicated cytokinins in the control of cell proliferation and cell fate in both shoot and root vascular development (de Leon et al., 2004; Higuchi et al., 2004; Mahonen et al., 2006a; Mahonen et al., 2006b; Nishimura et al., 2004).

In this study, we identify a new locus, *LONESOME HIGHWAY* (*LHW*), that is required to establish and maintain the normal vascular cell number and pattern in primary and lateral roots. Using a map-

Stanford University, Department of Biological Sciences, Stanford, CA 94305, USA.

\*Present address: Department of Biological Sciences, Graduate School of Science, The University of Tokyo, Tokyo, 113-0033, Japan

†Author for correspondence (e-mail: dbergmann@stanford.edu)

based cloning approach, we identified the *LHW* gene and found that it defines the first member of a clade of plant-specific genes. Further characterization of protein localization and activity suggests that *LHW* encodes a transcriptional activator, suggesting that *LHW* plays a regulatory role in establishing a 'set point' for the radial extent of the root vascular population.

## MATERIALS AND METHODS

### Screen

An ethylmethane-sulfonate (EMS)-mutagenized population of approximately 4000 M1s was created from plants homozygous for the enhancer trap J0121::GFP (ABRC stock CS9090, C24 ecotype) using standard *Arabidopsis* mutagenesis procedures. Approximately 48,000 roots of 5-day-old M2 seedlings were scored for deviations in J0121::GFP pattern. All lines were backcrossed at least twice before further analysis. Via backcrosses and complementation crosses, five mutations that resulted in the presence of a single J0121::GFP stripe were found to be recessive to wild-type and allelic to each other. The locus defined by mutations w305, w279, w130, w123 and w116 was designated *LONESOME HIGHWAY*, and the mutant alleles renamed *lhw-1* through to *lhw-5*, respectively. All *LHW* mutants were also crossed to Landsberg *erecta* (*Ler*) to establish mapping populations.

### Phenotypic characterization

Markers of cell fate used were: SCR::GFP (gift of J. Long, SALK, San Diego, CA), APLproAPL::GFP (Bonke et al., 2003), QC25::GUS (gift of B. Scheres, University of Utrecht, The Netherlands), J0121::GFP (ABRC stock CS9090), Q1630::GFP (ABRC stock CS9227), VH1::GUS (Clay and Nelson, 2002), DR5::GUS (Ulmasov et al., 1997) and CYCB1;1::GUS (Colon-Carmona et al., 1999; Donnelly et al., 1999). Unless otherwise indicated, the wild-type control for experiments with *lhw-1* and *lhw-2* is the unmutagenized parental line CS9090 (C24 ecotype). Seedlings were grown vertically on plants containing 0.5×MS, 1% agar. Expression of GFP markers was analyzed on a Bio-Rad 1024 confocal microscope, with propidium iodide counterstaining to observe cell morphology. Xylem was visualized by staining with 0.01% basic fuchsin. Root cross sections were prepared according to Scheres et al. (Scheres et al., 1995). Growth curves were performed by marking root lengths on the underside of plates every 24 hours during the growth of *lhw* and control parental plants grown side-by-side. Auxin analogue 2,4-dichlorophenoxyacetic acid (2,4D) and cytokinin (kinetin) effects on primary root growth were assayed at 5 days post germination (dpg). Seedlings grown on plates containing 20 μM 1-N-naphthylphthalamic acid (NPA) were scored at 7 dpg for rescue and at 21 dpg for terminal phenotypes. Images were processed for figures using Adobe Photoshop consistent with guidelines for image manipulation specified in the instructions for authors.

### Map-based cloning of *LHW*

All alleles were individually mapped using a standard set of PCR-based mapping primers (Lukowitz et al., 2000). Recombinants between CER459215 and CER460427 were identified from approximately 800 F2 individuals from a mapping outcross of *lhw-1* to *Ler* and scored for additional simple sequence length polymorphism (SSLP) markers, localizing *LHW* to an 80 kb region on BAC F12K2. T-DNA insertion alleles for 24/34 of the genes in the region were screened for root phenotypes and SALK\_079402 (At2g27230) exhibited a single-xylem-pole phenotype. Mutations leading to stop codons in the predicted open reading frame of At2g27230 were identified in four *LHW* alleles. Using numbering derived from AY035151, mutations were found in: *lhw-1*, G→A at 575; *lhw-2*, G→A at 1944; *lhw-3*, C→T at 1883; and *lhw-4*, G→A at 1066. *lhw-1* is predicted to truncate the protein at amino acid 23 and is probably a null. All phenotypic characterization was carried out with both *lhw-1* and *lhw-2*, and some tests with SALK\_079402, to ensure that the *lhw* phenotype was not ecotype dependent. All alleles behaved similarly, so only results from *lhw-1* are reported, except as noted. Full-length cDNA AY035151 was obtained from RIKEN, Japan. An error in the cDNA that introduced an additional G at position 918 was corrected by PCR. CaMV35S expression of this cDNA was capable of rescuing the xylem phenotype of *lhw-1* (Fig. 5B) in the T1 generation (6/14 independent lines).

### Yeast two-hybrid assay and screen

*LHW* and other clones were PCR amplified from cDNA clones or by reverse transcriptase (RT)-PCR and cloned into the Clontech Matchmaker vectors pGBK (bait) and pGAD (prey). *Saccharomyces cerevisiae* strains AH109 or Y187 were used as hosts. Bait clones were tested for transcriptional auto-activation by co-transformation with an empty prey vector. Direct interactions between plasmids were tested by retransformation of plasmids in pairwise comparisons. A screen of approximately 800,000 colonies was performed using the *LHW* bHLH domain and C-terminus (DB-bC) as bait and a prey library in pACT constructed by Kim and Theologis (ABRC stock CD4-22). Positive clones were tested to ensure a single plasmid was responsible for the interaction, sequenced, and then retransformed into a strain containing prey for confirmation of the interaction. Quantitative analysis of β-galactosidase (β-gal) expression was performed by transforming *LHW* variants into the yeast strain Y187 and following procedures in Clontech's yeast protocol guide.

### Expression studies

Total RNA for semi-quantitative RT-PCR was isolated from plant tissues using a micro-midi RNA isolation kit (Invitrogen). RNA (100 ng) was used in first-strand synthesis with superscript III (Invitrogen), followed by PCR with the gene-specific primers (shown 5'-3') *lhwrtf1*, GATCGT-GTCAAAGAGCTGCG and *lhwtr1*, TTCGAAAGCCCATGTTGCTCC, and control primers *actinF*, GGCGATGAAGCTCAATCCAAACG and *actinR*, GGTCACGACCAGCAAGATCAAGACG. *LHW* and *ACT* were amplified for 32 and 25 cycles, respectively, for 15 seconds at 95°C, 30 seconds at 52°C and 1 minute at 68°C. A β-glucuronidase (GUS) reporter for *LHW* expression was created by PCR amplifying 2.8 kb of genomic sequence 5' of the translational start site and cloning the piece into pCAMBIA 1303. Subcellular localization was determined by cloning the *LHW* cDNA from the translational start to one codon before the translational stop into pEZN (Cutler et al., 2000). Constructs were introduced into *Arabidopsis* plants via *Agrobacterium*-mediated transformation (Clough and Bent, 1998).

## RESULTS

### Identification of *LONESOME HIGHWAY*

To identify novel genes required for root cell fate specification, we screened for mutations that cause cell-identity defects within the seedling stele. The screen was facilitated by the use of the enhancer trap line J0121 to specifically mark xylem-adjacent pericycle cells (Laplaze et al., 2005). In wild-type roots, two J0121::GFP-positive stripes of cells became visible in the elongation zone and extended to the root-hypocotyl junction (Fig. 1B). Seedling roots were screened for alterations in the pattern of this marker at 5-7 days post germination (dpg). Five completely recessive and allelic (see Materials and methods) mutations were found that resulted in plants expressing J0121::GFP in only a single stripe (Fig. 1C and see Fig. S1 in the supplementary material). These five alleles define a new locus, *LONESOME HIGHWAY* (*LHW*). The absence of GFP expression correlates with a change in xylem-adjacent pericycle cell identity and/or function, as seen by the production of lateral roots from one side of the primary root only (Fig. 1D).

### Phenotypic analysis of *lhw* defects

Closer examination of *lhw* roots revealed that the bilaterally symmetric (diarch) organization of the stele was reduced to a monarch arrangement. In wild-type plants, two protoxylem strands ran the length of the root (Fig. 1E). In *lhw*, only one protoxylem strand was observed and, in most cases (34/40), was displaced from the center of the root. J0121::GFP expression was always adjacent to the single remaining xylem strand. In mature parts of the root, 2-5 files of metaxylem elements are normally found between the two protoxylem poles (Mahonon et al., 2000). In *lhw* plants, cells with the morphological characteristics of

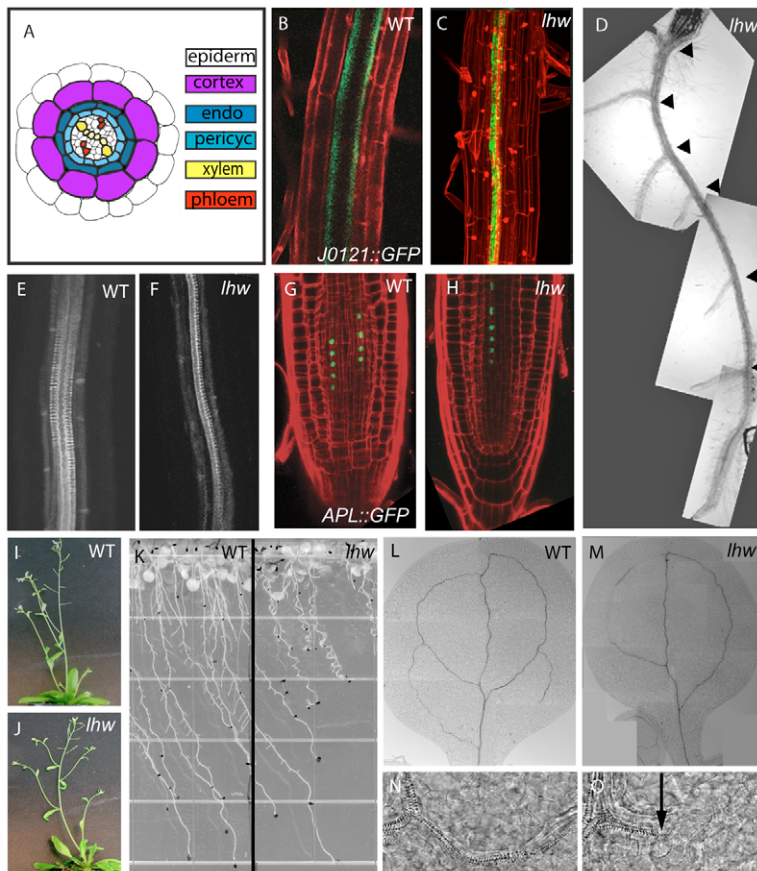

**Fig. 1. Phenotype of LONESOME HIGHWAY mutants.**

(A) Cross-section diagram of a mature *Arabidopsis* root; tissues are arranged radially from outside in: epidermis (white), cortex (purple), endodermis (dark blue) and stele [which consists of a ring of pericycle cells (light blue) that surrounds xylem (yellow) and phloem (red) arranged in bilateral symmetry]. (B, C) Confocal images of wild type (WT, B) and *lhw-1* (C) expressing the xylem-associated pericycle marker J0121::GFP (green). Roots are counterstained with propidium iodide (PI, red) to visualize the outlines of cells. (D) Bright-field image of a *lhw-1* root, which has all lateral roots (black arrowheads) emerging from a single side of the primary root. (E, F) Confocal image of basic fuchsin staining of xylem in wild type (E) and *lhw-1* (F). (G, H) Confocal images of wild type (G) and *lhw-1* (H) expressing the phloem marker APLpro::APL-GFP (green). (I, J) Whole-plant phenotypes of wild-type Col (I) and *lhw* SALK\_079402 (J). (K) Root growth of wild type (left) and *lhw-1* (right) on agar plates at 20 dpv. Notice the root-waving and short-root phenotypes in *lhw-1*. (L, M) Vascular pattern in mature (13 dpv) wild-type (L) and *lhw-1* (M) cotyledons. (N, O) Higher-magnification images of xylem from images L and M, respectively. The black arrow points to the end of mature xylem elements; to the right, elongated cells typical of procambium are still seen. For each marker, the wild-type and *lhw* image pair are at the same magnification.

metaxylem were made, and they had the same spatial relationship to the protoxylem pole, but there appeared to be only half as many metaxylem cells (Fig. 1F and Fig. 2). In addition to two xylem poles, *Arabidopsis* roots normally have two phloem poles. Phloem organization can be visualized by APLpro::APL-GFP expression (Bonke et al., 2003). In wild-type root tips, APLpro::APL-GFP was seen in nuclei of two cell files, corresponding to maturing protophloem (Fig. 1G). In *lhw*, only a single APLpro::APL-GFP-marked file was visible (Fig. 1H). Despite the reduced cell number in the root vasculature, *lhw* plants were healthy and fertile. Plants with mutations in *LHW* did not exhibit dramatically altered phyllotaxis, nor did they have any gross morphological abnormalities in their leaf and floral organs (Fig. 1I, J). *lhw* mutations in the C24 background led to plants that were slightly agravitropic, as seen by the waving of *lhw* roots as they grew down a slanted agar surface (Fig. 1K). In cotyledons, *lhw* vein development was delayed relative to wild type (Fig. 1L, M), and xylem gaps were still visible in the mature organs (Fig. 1N, O); however, leaf venation patterns appeared normal (data not shown).

The root vasculature phenotypes suggest that *lhw* does not have a defect in the production of any specific differentiated cell type, but that *LHW* is required to produce the normal arrangement and number of these cell types. In dicot roots, there is a strong correlation between the size of the stele and the number of xylem poles, and the experimental manipulation of cell number in some dicot roots leads to variation in vascular pole number (Torrey, 1955). In *Arabidopsis* primary roots, the stele is usually comprised of 12–13 pericycle cells (Dolan et al., 1993) and 25–28 internal cells at stages when mature xylem and phloem elements are found (Dolan et al., 1993) (Fig. 2F). To determine the number of cells in the *lhw* stele, we made cross-

sections of roots from the level of the meristem (Fig. 2B, C) through the mature zone (where root hairs are visible; Fig. 2H, I) and up into the hypocotyl (Fig. 2J, K). In cross-sections of a wild-type root (30  $\mu$ m above tip), the epidermis consisted of approximately 25 cells, the cortex and endodermal layers each consisted of 8 cells, and the stele (pericycle, xylem and phloem) consisted of approximately 33 cells (Table 1). In *lhw* roots, the normal number of cortex and endodermal cells was present and the epidermal number was slightly reduced, but the number of cells in the *lhw* stele was reduced to half as many as wild type (Fig. 2; Table 1). This affected all cell types in the stele; in addition to the reduction in cells from which the xylem and phloem arise, the *lhw* pericycle was reduced from the normal 13 cells to 8 cells (Fig. 2; Table 1).

The total number of cells in the seedling stele is a product of the initial pool in the embryo and cells created through postembryonic divisions. The number of stele cells visible in a cross-section of the *lhw* root at 30  $\mu$ m and 120  $\mu$ m is virtually unchanged (Table 1), suggesting that postembryonic divisions rarely occurred. In the embryo, the stele is derived from the uppermost tier of the RM (Dolan et al., 1993). Early embryogenesis in *lhw* was indistinguishable from wild type in terms of orientation of cell divisions (see Fig. S2A, B in the supplementary material). The only defect seen at a significant frequency (3/15 *lhw* globular embryos and 11/15 *lhw* late-heart-stage embryos) was a delay relative to wild type in divisions in the base of the embryo, in cells that would later become the RM (compare Fig. S1C with Fig. S1D, and Fig. S1E, G with Fig. S1F, H in the supplementary material). At the torpedo stage, *lhw* embryos appeared to have a well-formed vascular cylinder, but it was narrower in *lhw* than in wild type (compare Fig. S1J with Fig. S1I in the supplementary material).

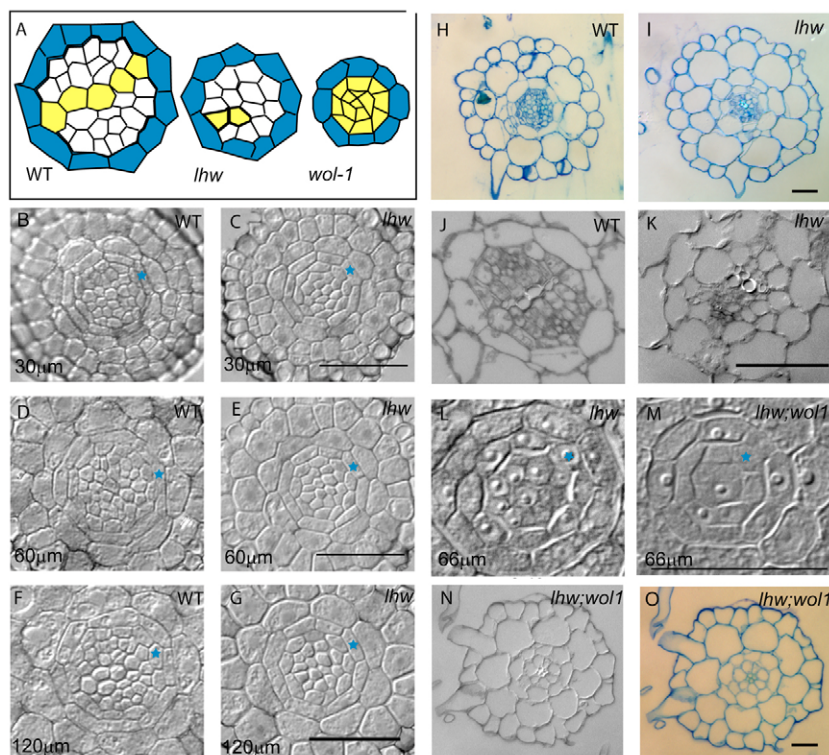

**Fig. 2. Cross sections of *lhw* roots and hypocotyls.** (A) Schematic of stele in cross sections from wild type (WT), *lhw* and *wol-1*; pericycle is in blue and xylem in yellow; wild type and *lhw* were traced from 2F and 2G, respectively. (B–G) Bright-field images of wild-type and *lhw* root sections taken at increasing distance from the tip of the root; for each, the same pericycle cell is marked with a blue star for orientation: (B) wild type, 30  $\mu\text{m}$ ; (C) *lhw-2*, 30  $\mu\text{m}$ ; (D) wild type, 60  $\mu\text{m}$ ; (E) *lhw-2*, 60  $\mu\text{m}$ ; (F) wild type, 120  $\mu\text{m}$ ; (G) *lhw-2*, 120  $\mu\text{m}$ . (H,I) Toluidine-blue staining of wild type (H) and *lhw-2* (I) in the mature zone. (J,K) Section through the lower third of the hypocotyl in wild type (J) and *lhw-2* (K). (L) Center of a *wol-1* root, 66  $\mu\text{m}$  from the tip. (M) Center of a *wol-1;lhw-1* root, 66  $\mu\text{m}$  from the tip. (N,O) DIC (N) and toluidine-blue (O) images of *wol-1;lhw-1* mature roots, showing the very reduced stele filled with xylem elements. Each image pair is at the same magnification. Scale bars: 20  $\mu\text{m}$ .

Because *lhw* mutants still made some lateral roots, we could examine the organization of these postembryonically formed organs. *Arabidopsis* lateral roots originate from a stereotyped series of divisions in three pericycle cell files adjacent to a xylem pole. Lateral roots normally have the same tissue organization as primary roots, although control over the number of cells in the cortex and endodermis is somewhat relaxed (Dolan et al., 1993). Despite early division patterns that were indistinguishable between wild type and *lhw* (see Fig. S1K–P in the supplementary material), *lhw* lateral roots generated only a single protoxylem pole (100%,  $n=40$ ), a single APLpro::APL-GFP-marked phloem pole (100%,  $n=20$ ) and a single J0121::GFP-marked xylem-adjacent pericycle file (97%,  $n=40$ ), suggesting that *LHW* is required to establish normal cell numbers in the stele of these organs.

### The relationship between *LHW* and auxin

Defects in lateral root formation and xylem differentiation suggest that *lhw* might have defects in auxin synthesis, transport or perception. However, *lhw* mutants did respond to exogenous auxins (IAA and 2,4D) by producing root hairs and lateral roots and inhibiting primary root elongation (see Fig. S3 in the supplementary material, and data not shown), yet these auxin treatments did not

rescue the xylem or pericycle defects (Fig. 3C and data not shown). We visualized local auxin response near the RM by scoring the expression pattern and intensity of the markers *DR5::GUS* and *PIN4::GUS* (Friml et al., 2002; Ulmasov et al., 1997). In *lhw* plants, expression of both markers was similar to wild type in intensity and in position of the maximum (compare Fig. 3G with Fig. 3F, and Fig. 3I with Fig. 3H).

Germination and growth on media containing the auxin-transport inhibitor NPA can lead to excessive RM proliferation and xylem production (Mattsson et al., 1999). *lhw* and wild-type plants grown on MS agar plates containing 20  $\mu\text{M}$  NPA were sampled at 7 and 21 dpv for xylem vessel formation and for expression of the J0121::GFP marker in roots. At neither time-point was expression of J0121::GFP seen in two stripes, nor was the second xylem pole restored in *lhw* plants (compare Fig. 3B with Fig. 3A, and data not shown). Morphology of the root tip was strikingly different between wild type and *lhw* at 21 dpv. In wild type, the roots became extensively fasciated and produced eight to ten xylem files (Fig. 3D). The *lhw* root tips were only slightly wider than untreated roots, failed to undergo excess cell proliferation and never produced more than a single differentiated xylem cell file (Fig. 3E). These data indicate that, although *lhw* plants appear to

**Table 1. Cell numbers in the primary root**

| Genotype           | 30 $\mu\text{m}$ |                |                | 60 $\mu\text{m}$ |                 |                 | 120 $\mu\text{m}$ |                |                  | Endodermis  | Cortex    | epidermis      |
|--------------------|------------------|----------------|----------------|------------------|-----------------|-----------------|-------------------|----------------|------------------|-------------|-----------|----------------|
|                    | Total stele      | Pericycle      | Inside         | Total stele      | Pericycle       | Inside          | Total stele       | Pericycle      | Inside           |             |           |                |
| Wild type          | 33               | 11.5           | 21.5           | 41 $\pm$ 1.0     | 13.33 $\pm$ 1.5 | 27.67 $\pm$ 1.5 | 41.67 $\pm$ 0.58  | 13 $\pm$ 0.0   | 28.67 $\pm$ 0.58 | 8 $\pm$ 0.0 | 8 $\pm$ 0 | 24.3 $\pm$ 2.1 |
| <i>lhw-1</i>       | 19 $\pm$ 1.7     | 8.5 $\pm$ 0.55 | 10.5 $\pm$ 1.5 | 20.33 $\pm$ 1.5  | 8.5 $\pm$ 0.55  | 11.83 $\pm$ 1.2 | 21.83 $\pm$ 1.6   | 8.33 $\pm$ 1.2 | 13.17 $\pm$ 1.5  | 8 $\pm$ 0.0 | 8 $\pm$ 0 | 20.6 $\pm$ 3.6 |
| <i>wol-1</i>       | 16               | 8              | 8              | 19               | 9               | 10              | 19                | 9              | 10               |             |           |                |
| <i>lhw-1;lhw-1</i> | 14 $\pm$ 3.0     | 7.67 $\pm$ 1.5 | 6.33 $\pm$ 1.5 | 14.67 $\pm$ 3.2* | 8 $\pm$ 1.0     | 6.67 $\pm$ 2.3  | 15.33 $\pm$ 2.9** | 8 $\pm$ 1.0    | 7.33 $\pm$ 2.1   |             |           |                |

Comparison of cell numbers in the stele of wild-type, *lhw* and other mutant roots. Number of roots scored/genotype: wild type=3, *lhw-1*=8, *wol-1*=2, *lhw-1;lhw-1*=3. Values are averages  $\pm$  s.d. *P* values for difference between number of cells in *lhw* and *lhw;lhw* stele: \**P*=0.08; \*\**P*=0.04. Lengths represent the distance from the root tip. 'Inside' refers to all cells interior to the ring of pericycle cells.

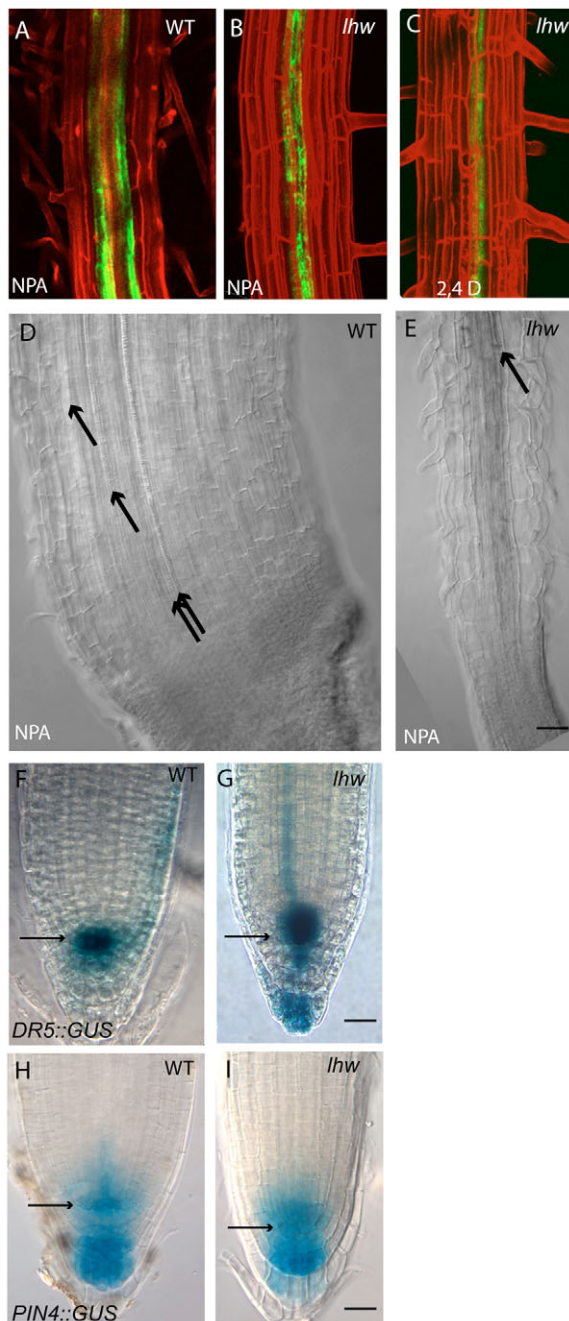

**Fig. 3. Measures of auxin response in *lhw*.** (A–C) Confocal images of wild type (WT, A) and *lhw-1* (B,C) expressing J0121::GFP (green). (A,B) After treatment with 20  $\mu$ M NPA for 7 days. (C) After treatment with 30 nM 2,4D for 7 days. (D,E) DIC images of roots treated with 20  $\mu$ M NPA for 21 days. Black arrows point to xylem elements. (F–I) Bright-field images of 7-dpg seedling root tips; (F,G) DR5::GUS expression; (H,I) PIN4::GUS expression. Each image pair (and A–C) is at the same magnification. Scale bars: 20  $\mu$ m.

perceive auxin and respond in terms of primary root inhibition and production of root hairs, they are unable to respond to auxin in the formation of xylem and pericycle. The simplest explanation for these phenotypes is that *LHW* is not a core component of auxin signaling but that *lhw* mutants are defective in a downstream process.

### The relationship between *LHW* and the cytokinin receptor *WOL*

Cytokinins, like auxin, are required for longitudinal proliferation in the root, but cytokinins also have significant roles in radial proliferation (Ferreira and Kieber, 2005; Mahonen et al., 2006a). The *wol-1* mutation in the *WOL* gene, encoding a cytokinin receptor, severely reduces cell proliferation in the stele (Mahonen et al., 2000). We tested whether *WOL* and *LHW* acted in the same genetic pathway by constructing double mutants between the two. *wol-1* roots are short and the number of cells interior to the pericycle is reduced to less than ten, all of which become xylem (Mahonen et al., 2000) (Table 1). Double mutants between *lhw* and *wol-1* exhibited the root-length defect of *wol-1*; however, the presence of the *wol-1* mutation further reduces the number of cell in the *lhw* stele (Fig. 2L–O; Table 1), suggesting that *LHW* promotes the production of stele cells in a somewhat *WOL*-independent manner. In addition to defects in cell proliferation, *wol-1* mutations eliminated phloem production and resulted in a stele consisting solely of protoxylem. In terms of cell identity, the *wol-1* mutation was epistatic to *lhw*, because the interior of the *lhw;wol-1* root resembled *wol-1*. The presence of multiple xylem poles in this double mutant indicates that there is no explicit requirement for *LHW* in the production of this cell type.

### *LHW* encodes a member of a novel, plant-specific, family of proteins

*LHW* appears to play a central role in defining the number of stele cells. In the root, a variety of biochemical functions have been defined by mutational analysis to be required for patterning the RM and balancing cell proliferation and differentiation. These include: core cell cycle regulators, components of cell signaling and hormone perception pathways, and transcriptional regulators (e.g. Aida et al., 2004; Blilou et al., 2002; Blilou et al., 2005; Friml et al., 2002; Mahonen et al., 2006a; Sabatini et al., 2003; Wildwater et al., 2005). To understand how *LHW* might control root development, we used a map-based cloning approach and found that *LHW* corresponds to At2g27230, a locus that encodes a protein of 650 amino acids (see Materials and methods). Initial searches of databases with *LHW* revealed that it was a plant-specific protein of unknown function. *LHW* is closely related to three other uncharacterized proteins in *Arabidopsis* (encoded by At1g06150, At1g64625 and At2g31280) and to two proteins in rice (encoded by Os12g06330 and Os11g06010). The highest similarities among these proteins are in an N-terminal and a C-terminal region (Fig. 4B and see Fig. S4 in the supplementary material). Although the N-terminal region does not resemble any domains of known biochemical function, part of the C-terminal domain is weakly similar to basic helix-loop-helix (bHLH) transcription factors (Fig. 4B). Alignments of *LHW* with typical bHLHs (At1g66470 and At5g37800) revealed that this similarity is most convincing in the predicted dimerization domain (boxed in Fig. 4B); however, the canonical DNA-contacting residues are not conserved in *LHW*, and *LHW* was not considered a bHLH by two independent groups conducting comprehensive analyses of the family (Heim et al., 2003; Toledo-Ortiz et al., 2003).

### Transcriptional activation and HLH dimerization activity of *LHW*

Proteins in the bHLH class generally interact with DNA and regulate transcription as dimers. They can partner with a variety of protein classes, including a class of proteins [the inhibitor of differentiation (Id) proteins] that have HLH dimerization domains but that lack a

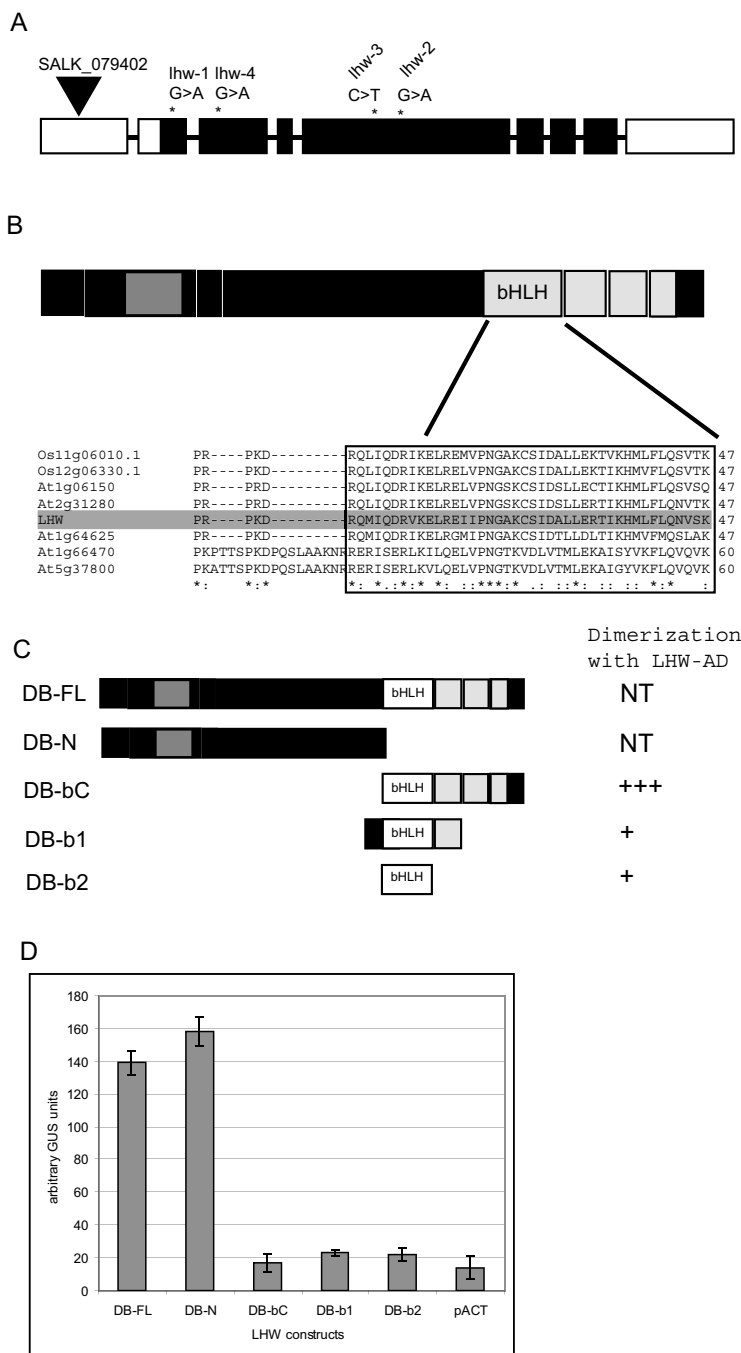

**Fig. 4. LHW gene and protein structure, and its behavior in a two-hybrid screen. (A)** LHW gene structure, with exons represented as boxes and introns as lines. The LHW coding region is in black. The location and nature of *lhwh* mutant alleles is indicated above the exons. **(B)** LHW protein structure. Two domains that are conserved with other plant proteins are indicated as grey boxes. Part of the C-terminal conserved region resembles the bHLH domain of transcriptional regulators. A sequence alignment of the putative bHLH domain (boxed) is diagrammed for LHW and for related proteins from *Arabidopsis* and rice. **(C)** Graphical representation of LHW protein fragments used in the yeast two-hybrid assay and their ability to dimerize with full-length LHW. **(D)** GAL4 transcriptional activation activity of LHW variants; pACT is included as a negative control. GUS measurements are based on four replicates/sample. Error bars  $\pm$ s.e.m. NT, not tested.

DNA-binding domain and antagonize bHLH function (Chen et al., 1996). We examined whether LHW had any properties consistent with it acting as a transcriptional regulator and/or interacting with canonical bHLH proteins.

LHW can activate transcription when fused to a DNA-binding domain in a yeast two-hybrid assay (DB-FL; Fig. 4C,D). A series of deletion constructs established that the N-terminus (DB-N) was responsible for this activity (Fig. 4D). Neither the bHLH and C-terminal domain (DB-bC), nor the bHLH domain alone (DB-b1 and DB-b2), could activate transcription. To test whether LHW could homodimerize, a non-auto-activating portion of the protein (DB-bC) was co-transformed with variants of LHW fused to the GAL4 activation domain (AD). LHW (DB-bC) interacted strongly with

full-length LHW (AD-FL) and with LHW missing the N-terminus (AD-bC), and weakly with versions of LHW containing only the bHLH domain (AD-b1 and AD-b2) (Fig. 4C).

We then performed a two-hybrid screen using a library made from seedling cDNA (see Materials and methods) to identify other potential partners of LHW. In a screen of 800,000 colonies, 12 prey constructs interacted with LHW (DB-bC) under stringent conditions. Nine of the clones corresponded to four bHLH genes: At5g08130 (five clones); At1g68810 (two clones); At1g29950 (one clone) and At3g25710 (one clone). This suggests that LHW readily binds to typical bHLH proteins. The bHLH proteins that were identified in the two-hybrid screen have not been extensively characterized. However, it is interesting that, *in silico*, transcripts

for each of these bHLHs are enriched in root tips or found in xylem cell populations (Birnbaum et al., 2005) (<http://bbc.botany.utoronto.ca/efp>)

### Expression pattern of *LHW*

The defects seen in *lhw* mutants suggested that *LHW* would be required in the RM, particularly in the vascular initials. By semi-quantitative reverse transcriptase (RT)-PCR, *LHW* expression was seen to be highest in the meristematic regions of both the root and shoot, and was lowest in mature tissues (Fig. 5F). A transcriptional reporter, containing 2.8 kb of the sequence 5' of the *LHW* start codon fused to *GUS*, was expressed in the root tip, including, but not exclusively within, the meristem (Fig. 5C-E). This expression pattern is consistent with root transcriptional profiling data that finds *At2g27230* to be enriched in stage-1 (closest to the meristem) roots (Birnbaum et al., 2003) and enriched in the QC cell population relative to other cell types (Nawy et al., 2005).

To determine the subcellular localization of *LHW*, roots of *Arabidopsis* stably transformed with *35Spro::LHW-GFP* were examined. GFP expression was visible in nuclei (Fig. 5A,B). Expression of these constructs in *lhw-1* mutant plants was sufficient to rescue the xylem pole defect in T1 plants (Fig. 5B), but expression in wild type did not result in any obvious phenotypes in root length, vasculature or overall plant morphology in T1 plants (data not shown). Silencing of the *LHW* transgene was often observed in T2 lines as a reduction in GFP expression and by the appearance of a single xylem pole in plants with a wild-type genomic copy of *LHW* (data not shown).

### Analysis of the requirement for *LHW* in root meristem maintenance

Given its identity, activities and expression pattern, we hypothesized that *LHW* was required in the meristem to promote cell divisions that establish the normal size of the stele. Similar roles are played by transcriptional regulators such as *SCR* and *SHR*, which are important for regulating both radial and longitudinal growth. *SCR* is normally expressed in the QC, in endodermal/cortex initials and in the maturing endodermis of the root (Di Laurenzio et al., 1996). Mosaic analysis revealed that *SCR* has a cell-autonomous role in maintaining the QC (Heidstra et al., 2004; Sabatini et al., 2003). When we examined the expression of *SCRpro::GFP* in 7-dpg *lhw*, we found, unexpectedly, that the reporter was present in the endodermis, but not in the QC (0/40 *lhw* plants compared with 38/40 wild-type plants; Fig. 6B versus 6A). In torpedo-stage *lhw* embryos, however, *SCRpro::GFP* was present in QC cells (Fig. 6C), suggesting that *SCR* expression is lost over time.

Loss of *SCR* expression in the QC is reminiscent of the phenotypes of *hobbit* (Blilou et al., 2002) and *shr* (Helariutta et al., 2000) mutants; both *HOBBIT* and *SHR* are required for meristem maintenance. The arrangement of *SCRpro::GFP*-expressing cells in *lhw* mutants was also similar to that in roots provided with only endodermal expression of *SCR* (Sabatini et al., 2003). Because roots lacking *SCR* in the QC often have a compromised RM (Sabatini et al., 2003), we examined several other markers of 'meristem health' in *lhw*, including the expression of QC identity markers, the longitudinal extent of the zone of proliferation and whether *lhw* roots exhibited determinate growth.

In wild-type plants, *QC25::GUS* is expressed specifically in the QC (Sabatini et al., 2003). At 7 dpg, *lhw* mutants expressed *QC25::GUS* but, interestingly, the intensity of *GUS* expression in the QC cells was often asymmetric (14/20 *lhw* plants versus 0/10 wild type; Fig. 6H,I). The intensity of staining did not appear to be

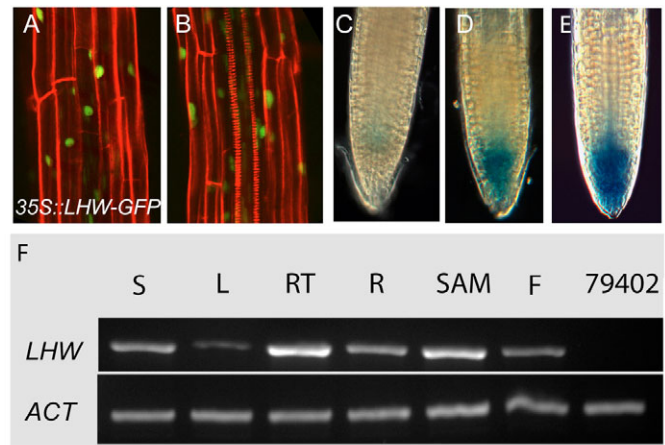

**Fig. 5. *LHW* expression.** (A,B) Confocal images of *lhw-2* roots expressing *35S::LHW-GFP* in their nuclei (green). Expression of this transgene is sufficient to rescue the *lhw-2* xylem phenotype (B). (C-E) *LHWpro::GUS* reporter expression in root tips after staining for 1, 4 or 8 hours, respectively. (F) RT-PCR of *LHW* and *ACTIN* (*ACT*) expression. S, 14-dpg seedling; L, expanded rosette leaf; RT, 5 mm of 14-dpg root tip; R, whole 14-dpg root; SAM, transition SAM and youngest leaves; F, flower stage 8-15; 79402, 14-dpg seedling of *SALK\_79402*.

correlated with the side on which the protoxylem formed (data not shown). Despite this asymmetry, at 7 dpg, the *lhw* RM appeared to have normal proliferative capacity, as assayed by root growth (Fig. 6Q) and by the presence of columella initials. Columella initials are identified as a layer of cells between the QC and the cells expressing the columella marker *Q1630::GFP* and starch granules (Fig. 6D,E and data not shown). Several groups have used the expression of a mitotic cyclin (*CYCB1;1*) to measure the longitudinal extent of the proliferative zone (e.g. Aida et al., 2004; Hutchison et al., 2006; Ioio et al., 2007). At 7 dpg, the region of *CYCB1;1pro::GUS*-expressing cells was similar in wild-type and *lhw* (Fig. 6F,G;  $119 \mu\text{m} \pm 1.6$  s.d. in wild type,  $n=11$ ;  $125 \mu\text{m} \pm 1.73$  in *lhw-1*,  $n=10$ ). Together, these data suggest that *LHW* is not required for the establishment of a functioning RM.

Despite the normal early development, maintenance of the *lhw* RM failed over time. At 13 days, *QC25::GUS* was still expressed (Fig. 6J versus 6K), but columella initials began to differentiate and contained starch grains (Fig. 6L, star). At 17 dpg, the meristem of *lhw* roots was visibly disorganized. In contrast to wild-type roots (Fig. 6M,N), *lhw* roots exhibited a variety of defects, including a failure to express *QC25::GUS* (5/10; Fig. 6P), the loss of columella initials (6/10; Fig. 6O) and grossly abnormal QC morphology (4/10; Fig. 6O). The RM abnormalities correlated with decreased growth; beginning at approximately 10 dpg, *lhw* root growth slowed relative to wild type and, by 19 days, *lhw* primary roots ceased growing (Fig. 6Q).

### DISCUSSION

We have identified, characterized and cloned a new regulator of development in *Arabidopsis*. *LHW* positively regulates the size of the stele cell population and is required to establish the normal diarch pattern of root vascular tissues. One of the most striking aspects of the *lhw* mutant phenotype is that the vascular cylinder is not just reduced, but that *lhw* roots seem to have a new 'set point' for the number of cells in the stele, which, in the mature zone, is consistently half of the wild-type number. All *lhw* primary and

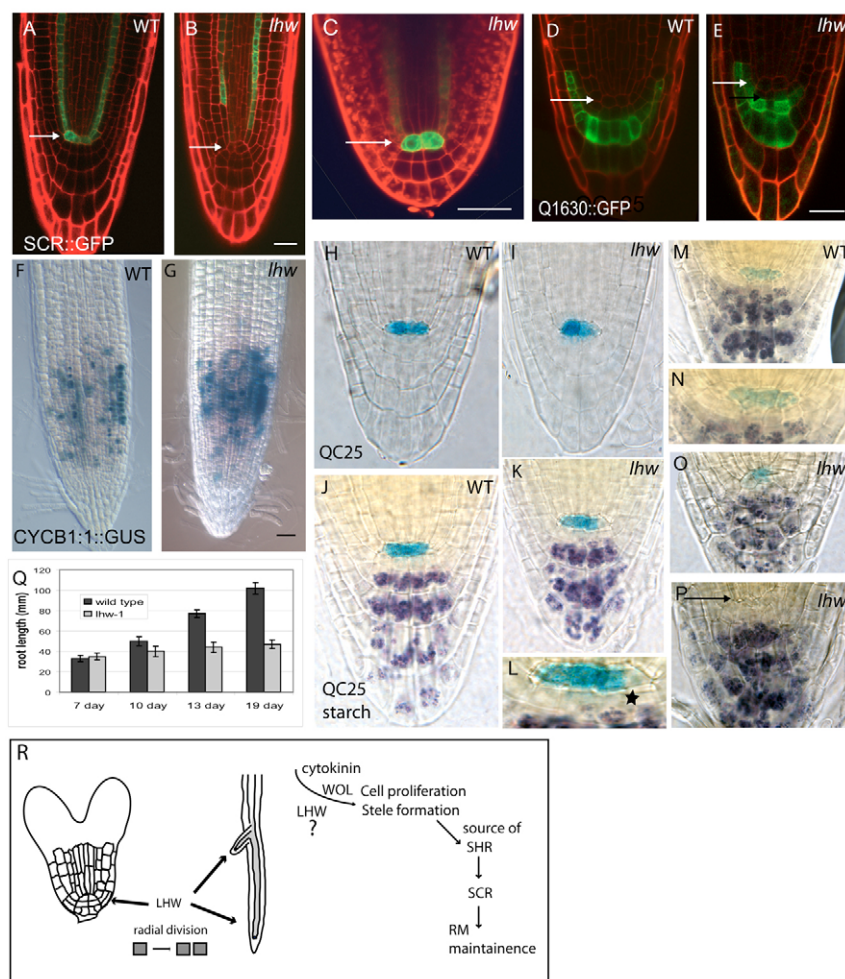

**Fig. 6. The effects of LHW on RM establishment and maintenance.**

(A–P) Expression of meristem markers (green) in wild-type (WT) and *lhw-1* 7-dpg seedlings. (A,B) *SCR::GFP* expression; (C) *SCR::GFP* expression in a torpedo-stage *lhw-1* embryo; (D,E) columella differentiation marker Q1630::GFP expression; (F,G) *CYCB1;2::GUS* expression; (H–P) *QC25::GUS* (blue) and starch granules (purple) mark the degeneration of the *lhw* meristem over time (H–I, 7 dp; J–L, 13 dp; M–P, 18 dp). (L) Higher-magnification image of K; star indicates starch-granule-containing cells adjacent to *QC25*-marked cells. (N) Higher-magnification image of M. For each marker, the wild-type and *lhw* image pair are at the same magnification. Arrows point to quiescent center (QC) cells. (Q) Graph of wild-type (dark grey) and *lhw-1* (light grey) root growth over time. Error bars  $\pm$ s.e.m. (R) Model for LHW action in generating vascular pattern. LHW is required to establish the radial extent of the root vascular tissues in the embryo and promotes postembryonic divisions in these tissues. LHW therefore acts as a meristem size-control protein for the center of the root. LHW and WOL are both required for these cell divisions, but appear to act at least somewhat independently. We propose that the eventual slowing down of longitudinal growth in *lhw* mutant roots is not due to a direct requirement for LHW in meristem maintenance, but because LHW is required to create the tissue that normally produces SHR. Without adequate levels of SHR, SCR is not maintained in the QC and meristems eventually terminate. Scale bars: 30  $\mu$ m.

lateral roots produced single files of protoxylem, metaxylem, phloem and lateral-root-producing pericycle cells. Size and symmetry can be mechanically connected when pattern is generated via inhibitory signals from differentiating tissues or cells. The organization of vascular tissues in plants has been hypothesized to result from feed-forward mechanisms that promote both the formation of continuous vascular strands (canalization) and lateral inhibition that creates spaces between the strands (reviewed in Turner and Sieburth, 2002). If this hypothesis is correct, then it suggests that LHW is required only for cell production, because the *lhw* mutants leave the lateral-inhibition system intact.

LHW exhibits several characteristics consistent with it being a transcription factor; it is likely, therefore, to play a regulatory role upstream in a division/differentiation pathway. It is somewhat mysterious how mutations in such a factor consistently reduce the size of the stele cell population to half that of wild type. Several possible ways to account for this are: (1) the described alleles of LHW only partially reduce function; (2) LHW paralogs partially compensate for function and/or; (3) additional inputs from unrelated transcription factors or signaling systems contribute to stele size. We think it unlikely that the *lhw* mutations are partial loss-of-function, because at least six LHW alleles exhibit identical phenotypes and two of these mutations (*lhw-1* and SALK\_079402) are expected to produce no functional protein. In silico expression patterns of the LHW paralogs At1g06150, At1g64625 and At2g31280 are consistent with these genes playing a role in root development; however, no single-mutant phenotypes have been observed for T-

DNA insertion alleles of these genes (D.C.B., unpublished). It is still possible that multiple-mutant combinations might reveal the role of these genes in relation to LHW and root development.

If stele cell number is controlled by LHW in parallel with other factors, then cytokinin is a likely candidate. Cytokinin signaling is required for the repression of xylem differentiation and for the promotion of stele cell proliferation (Mahonen et al., 2006a; Mahonen et al., 2006b). Like cytokinin, LHW is required to promote cell proliferation in the stele; however, LHW is also required to promote protoxylem formation – a combination of phenotypes inconsistent with a simple increase or reduction in cytokinin synthesis or response. In addition, *lhw-1;wol-1* roots have significantly fewer stele cells in the mature zone than do *lhw* mutants. The interpretation of this genetic result is complicated because WOL is one of three cytokinin receptors required for root vascular development (Higuchi et al., 2004; Mahonen et al., 2006b). The *wol-1* mutation has been reported to mimic the loss of all three receptors in root vascular development (Mahonen et al., 2006a; Mahonen et al., 2006b); if *wol-1* eliminates cytokinin perception, then LHW and cytokinin are likely to be two of several inputs that promote proliferation of the stele independently.

We interpret the appearance of a smaller provascular region in the *lhw* embryo and young lateral roots as meaning that the primary role of LHW is to produce the wild-type number of stele initial cells in the radial direction. However, we also demonstrated that LHW is required to maintain growth in the longitudinal direction. LHW could have a direct or indirect role in maintaining the RM. In



contrast to other root-patterning mutants that exhibit a clear 'short root' phenotype, *lhw* mutant roots were not noticeably shorter than wild type until 10 dpg. Abnormalities in the QC cells, however, preceded this growth defect, and previous studies have shown that the self-renewing properties of the RM initials are maintained through interactions with the QC cells (Aida et al., 2004; Sabatini et al., 2003; van den Berg et al., 1997; Wildwater et al., 2005). By 5 dpg, *lhw* roots failed to express *SCR* in the QC; by 7 dpg, the majority of *lhw* roots expressed *QC25::GUS* asymmetrically and a small fraction exhibited morphological abnormalities in the QC cells. The finding that *SCR* is missing from the QC earlier than other markers could indicate a specific requirement for *LHW* to promote the expression of this gene. Alternatively, *LHW* might be indirectly required for the RM via its effects on *SHR* production. The disappearance of *SCR* from the QC is seen in reduction-of-function mutations of *SHR* (Sabatini et al., 2003). Because *LHW* acts early to establish the number of cells in the radial direction of the stele and *SHR* RNA is produced exclusively in the stele, the loss of *SCR* and the gradual slowing of root growth in *lhw* mutants might be due to the reduction of the *SHR* source (Fig. 6R).

In the future, several lines of inquiry might illuminate whether *LHW* plays an indirect or direct role in RM maintenance. For example, when *RETINOBLASTOMA-RELATED* function is inactivated specifically in the meristem (rBRr), a larger RM is created (Wildwater et al., 2005). If rBRr can rescue *lhw* stele size, pattern and premature termination, then it is likely that *LHW* acts through this cell cycle controller to reach the balance of cells in the stele, and that the effects of *lhw* on longitudinal growth are largely indirect. If pattern and size are rescued, but the meristem terminates, then *LHW* might have a direct and independent role in creating and maintaining a functional stem cell pool in the root.

*LHW* is the first characterized member of a clade of proteins that represent potential transcriptional regulators in *Arabidopsis* and in other plants, including rice, a monocot, and poplar, a woody species. Root architecture is significantly different between monocots and dicots; therefore, it would be particularly interesting to see whether *LHW* orthologs retain a similar role in promoting vascular proliferation, and how this role manifests itself in a structurally diverse root system. Because *LHW* represents a xylem-promoting factor, its potential for promoting growth in trees might prove valuable for wood and biofuel production.

The authors wish to thank J. Long (SALK, CA), B. Scheres (U. Utrecht), Y. Helariutta (U. Helsinki) and the ABRC stock center for providing materials. We thank members of the laboratory and colleagues Wolfgang Lukowitz, Kathy Barton and Matt Evans for helpful discussions and/or comments on the manuscript; Cora MacAlister for statistics consulting; and Chris Somerville for support in the initial stages of the project. This work was supported by funds from US-DOE-FG02-03ER20133 to Chris Somerville and Ruth L. Kirschstein NRSA fellowship (5F32GM064273-03) and Stanford University funds to D.C.B.

#### Supplementary material

Supplementary material for this article is available at <http://dev.biologists.org/cgi/content/full/134/16/2959/DC1>

#### References

- Aida, M., Beis, D., Heidstra, R., Willemsen, V., Blilou, I., Galinha, C., Nussaume, L., Noh, Y. S., Amasino, R. and Scheres, B. (2004). The PLETHORA genes mediate patterning of the Arabidopsis root stem cell niche. *Cell* **119**, 109-120.
- Birnbaum, K., Shasha, D. E., Wang, J. Y., Jung, J. W., Lambert, G. M., Galbraith, D. W. and Benfey, P. N. (2003). A gene expression map of the Arabidopsis root. *Science* **302**, 1956-1960.
- Birnbaum, K., Jung, J. W., Wang, J. Y., Lambert, G. M., Hirst, J. A., Galbraith, D. W. and Benfey, P. N. (2005). Cell type-specific expression profiling in plants via cell sorting of protoplasts from fluorescent reporter lines. *Nat. Methods* **2**, 615-619.
- Blilou, I., Frugier, F., Folmer, S., Serralbo, O., Willemsen, V., Wolkenfelt, H., Eloy, N. B., Ferreira, P. C., Weisbeek, P. and Scheres, B. (2002). The Arabidopsis HOBBIT gene encodes a CDC27 homolog that links the plant cell cycle to progression of cell differentiation. *Genes Dev.* **16**, 2566-2575.
- Blilou, I., Xu, J., Wildwater, M., Willemsen, V., Paponov, I., Friml, J., Heidstra, R., Aida, M., Palme, K. and Scheres, B. (2005). The PIN auxin efflux facilitator network controls growth and patterning in Arabidopsis roots. *Nature* **433**, 39-44.
- Bonke, M., Thitamadee, S., Mahonen, A. P., Hauser, M. T. and Helariutta, Y. (2003). APL regulates vascular tissue identity in Arabidopsis. *Nature* **426**, 181-186.
- Chen, C. M., Kraut, N., Groudine, M. and Weintraub, H. (1996). I-Mf, a novel myogenic repressor, interacts with members of the MyoD family. *Cell* **86**, 731-741.
- Clay, N. K. and Nelson, T. (2002). VH1, a provascular cell-specific receptor kinase that influences leaf cell patterns in Arabidopsis. *Plant Cell* **14**, 2707-2722.
- Clough, S. J. and Bent, A. F. (1998). Floral dip: a simplified method for agrobacterium-mediated transformation of Arabidopsis thaliana. *Plant J.* **16**, 735-743.
- Colon-Carmona, A., You, R., Haimovitch-Gal, T. and Doerner, P. (1999). Technical advance: spatio-temporal analysis of mitotic activity with a labile cyclin-GUS fusion protein. *Plant J.* **20**, 503-508.
- Cutler, S. R., Ehrhardt, D. W., Griffitts, J. S. and Somerville, C. R. (2000). Random GFP::cDNA fusions enable visualization of subcellular structures in cells of Arabidopsis at a high frequency. *Proc. Natl. Acad. Sci. USA* **97**, 3718-3723.
- de Leon, B. G., Zorrilla, J. M., Rubio, V., Dahiya, P., Paz-Ares, J. and Leyva, A. (2004). Interallelic complementation at the Arabidopsis CRE1 locus uncovers independent pathways for the proliferation of vascular initials and canonical cytokinin signalling. *Plant J.* **38**, 70-79.
- Di Laurenzio, L., Wysocka-Diller, J., Malamy, J. E., Pysh, L., Helariutta, Y., Freshour, G., Hahn, M. G., Feldmann, K. A. and Benfey, P. N. (1996). The SCARECROW gene regulates an asymmetric cell division that is essential for generating the radial organization of the Arabidopsis root. *Cell* **86**, 423-433.
- Dolan, L., Janmaat, K., Willemsen, V., Linstead, P., Poethig, S., Roberts, K. and Scheres, B. (1993). Cellular organisation of the Arabidopsis thaliana root. *Development* **119**, 71-84.
- Donnelly, P. M., Bonetta, D., Tsukaya, H., Dengler, R. E. and Dengler, N. G. (1999). Cell cycling and cell enlargement in developing leaves of Arabidopsis. *Dev. Biol.* **215**, 407-419.
- Ferreira, F. J. and Kieber, J. J. (2005). Cytokinin signaling. *Curr. Opin. Plant Biol.* **8**, 518-525.
- Friml, J., Benkova, E., Blilou, I., Wisniewska, J., Hamann, T., Ljung, K., Woody, S., Sandberg, G., Scheres, B., Jurgens, G. et al. (2002). AtPIN4 mediates sink-driven auxin gradients and root patterning in Arabidopsis. *Cell* **108**, 661-673.
- Heidstra, R., Welch, D. and Scheres, B. (2004). Mosaic analyses using marked activation and deletion clones dissect Arabidopsis SCARECROW action in asymmetric cell division. *Genes Dev.* **18**, 1964-1969.
- Heim, M. A., Jakoby, M., Werber, M., Martin, C., Weisshaar, B. and Bailey, P. C. (2003). The basic helix-loop-helix transcription factor family in plants: a genome-wide study of protein structure and functional diversity. *Mol. Biol. Evol.* **20**, 735-747.
- Helariutta, Y., Fukaki, H., Wysocka-Diller, J., Nakajima, K., Jung, J., Sena, G., Hauser, M. T. and Benfey, P. N. (2000). The SHORT-ROOT gene controls radial patterning of the Arabidopsis root through radial signaling. *Cell* **101**, 555-567.
- Higuchi, M., Pischke, M. S., Mahonen, A. P., Miyawaki, K., Hashimoto, Y., Seki, M., Kobayashi, M., Shinozaki, K., Kato, T., Tabata, S. et al. (2004). In planta functions of the Arabidopsis cytokinin receptor family. *Proc. Natl. Acad. Sci. USA* **101**, 8821-8826.
- Hutchison, C. E., Li, J., Argueso, C., Gonzalez, M., Lee, E., Lewis, M. W., Maxwell, B. B., Perdue, T. D., Schaller, G. E., Alonso, J. M. et al. (2006). The Arabidopsis histidine phosphotransfer proteins are redundant positive regulators of cytokinin signaling. *Plant Cell* **18**, 3073-3087.
- Inoue, T., Higuchi, M., Hashimoto, Y., Seki, M., Kobayashi, M., Kato, T., Tabata, S., Shinozaki, K. and Kakimoto, T. (2001). Identification of CRE1 as a cytokinin receptor from Arabidopsis. *Nature* **409**, 1060-1063.
- Ioio, R. D., Linhares, F. S., Scacchi, E., Casamitjana-Martinez, E., Heidstra, R., Costantino, P. and Sabatini, S. (2007). Cytokinins determine Arabidopsis root-meristem size by controlling cell differentiation. *Curr. Biol.* **17**, 678-682.
- Kidner, C., Sundaresan, V., Roberts, K. and Dolan, L. (2000). Clonal analysis of the Arabidopsis root confirms that position, not lineage, determines cell fate. *Planta* **211**, 191-199.
- Laplaze, L., Parizot, B., Baker, A., Ricaud, L., Martiniere, A., Auguy, F., Franche, C., Nussaume, L., Bogusz, D. and Haseloff, J. (2005). GAL4-GFP enhancer trap lines for genetic manipulation of lateral root development in Arabidopsis thaliana. *J. Exp. Bot.* **56**, 2433-2442.
- Lukowitz, W., Gillmor, C. S. and Scheible, W. R. (2000). Positional cloning in Arabidopsis. Why it feels good to have a genome initiative working for you. *Plant Physiol.* **123**, 795-805.
- Mahonen, A. P., Bonke, M., Kauppinen, L., Riikonen, M., Benfey, P. N. and

- Helariutta, Y.** (2000). A novel two-component hybrid molecule regulates vascular morphogenesis of the Arabidopsis root. *Genes Dev.* **14**, 2938-2943.
- Mahonen, A. P., Bishopp, A., Higuchi, M., Nieminen, K. M., Kinoshita, K., Tormakangas, K., Ikeda, Y., Oka, A., Kakimoto, T. and Helariutta, Y.** (2006a). Cytokinin signaling and its inhibitor AHP6 regulate cell fate during vascular development. *Science* **311**, 94-98.
- Mahonen, A. P., Higuchi, M., Tormakangas, K., Miyawaki, K., Pischke, M. S., Sussman, M. R., Helariutta, Y. and Kakimoto, T.** (2006b). Cytokinins regulate a bidirectional phosphorelay network in Arabidopsis. *Curr. Biol.* **16**, 1116-1122.
- Malamy, J. E. and Benfey, P. N.** (1997). Organization and cell differentiation in lateral roots of Arabidopsis thaliana. *Development* **124**, 33-44.
- Mattsson, J., Sung, Z. R. and Berleth, T.** (1999). Responses of plant vascular systems to auxin transport inhibition. *Development* **126**, 2979-2991.
- Nakajima, K., Sena, G., Nawy, T. and Benfey, P. N.** (2001). Intercellular movement of the putative transcription factor SHR in root patterning. *Nature* **413**, 307-311.
- Nawy, T., Lee, J. Y., Colinas, J., Wang, J. Y., Thongrod, S. C., Malamy, J. E., Birnbaum, K. and Benfey, P. N.** (2005). Transcriptional profile of the Arabidopsis root quiescent center. *Plant Cell* **17**, 1908-1925.
- Nishimura, C., Ohashi, Y., Sato, S., Kato, T., Tabata, S. and Ueguchi, C.** (2004). Histidine kinase homologs that act as cytokinin receptors possess overlapping functions in the regulation of shoot and root growth in Arabidopsis. *Plant Cell* **16**, 1365-1377.
- Sabatini, S., Heidstra, R., Wildwater, M. and Scheres, B.** (2003). SCARECROW is involved in positioning the stem cell niche in the Arabidopsis root meristem. *Genes Dev.* **17**, 354-358.
- Scheres, B., Di Laurenzio, L., Willemsen, V., Hauser, M. T., Janmaat, K., Weisbeek, P. and Benfey, P. N.** (1995). Mutations affecting the radial organisation of the Arabidopsis root display specific defects throughout the embryonic axis. *Development* **121**, 53-62.
- Toledo-Ortiz, G., Huq, E. and Quail, P. H.** (2003). The Arabidopsis basic/helix-Loop-Helix transcription factor family. *Plant Cell* **15**, 1749-1770.
- Torrey, J. G.** (1955). On the determination of vascular patterns during tissue differentiation in excised pea roots. *Am. J. Bot.* **42**, 183-198.
- Turner, S. and Sieburth, L. E.** (2002). Vascular patterning. In *The Arabidopsis Book* (ed. C. R. Somerville and E. M. Meyerowitz). Rockville, MD: American Society of Plant Biologists. doi: 1199/tab.0073.
- Ulmasov, T., Murfett, J., Hagen, G. and Guilfoyle, T. J.** (1997). Aux/IAA proteins repress expression of reporter genes containing natural and highly active synthetic auxin response elements. *Plant Cell* **9**, 1963-1971.
- van den Berg, C., Willemsen, V., Hendriks, G., Weisbeek, P. and Scheres, B.** (1997). Short-range control of cell differentiation in the Arabidopsis root meristem. *Nature* **390**, 287-289.
- Wildwater, M., Campilho, A., Perez-Perez, J. M., Heidstra, R., Bliou, I., Korthout, H., Chatterjee, J., Mariconti, L., Grissem, W. and Scheres, B.** (2005). The RETINOBLASTOMA-RELATED gene regulates stem cell maintenance in Arabidopsis roots. *Cell* **123**, 1337-1349.
